## **Intestinal parasitic infections associated with nutritional status and inflammatory markers among young children in Huye district, Rwanda.**

**Authors:** Wellars Twahirwa<sup>1,2\*</sup>, Xavier Nyandwi<sup>1,3</sup>, Jean D'Amour Iradukunda<sup>1,4,5</sup>, Jean Felix Muneza<sup>1</sup>, Philbert Kanimba<sup>1</sup>, Khadijat O. Adefaye<sup>6</sup>, Noel Gahamanyi<sup>7,8</sup>, Nadine Rujeni<sup>1</sup>

### ***Affiliations:***

<sup>1</sup>*Biomedical Laboratory Sciences Department, School of Health Sciences, College of Medicine and Health Sciences, University of Rwanda, Kigali, Rwanda;*

<sup>2</sup>*Laboratory Department, Kibungo Level 2 Teaching Hospital, East, Rwanda;*

<sup>3</sup>*Laboratory Department, Kibagabaga Level 2 Teaching Hospital, Kigali, Rwanda;*

<sup>4</sup>*Laboratory Department, Masaka District Hospital, Kigali, Rwanda;*

<sup>5</sup>*Youths Empowerment Scholars Initiative Rwanda, Kigali, Rwanda*

<sup>6</sup>*Department of sciences, Technologies and health, University of La Rochelle, La Rochelle, France;*

<sup>7</sup>*Biology Department, School of Science, College Science and Technology, University of Rwanda, Kigali, Rwanda;*

<sup>8</sup>*National Reference Laboratory, Rwanda Biomedical Centre, Kigali, Rwanda*

### **\*Correspondence to:**

Wellars Twahirwa, Email: [twahwella@gmail.com](mailto:twahwella@gmail.com)

### **ABSTRACT**

**Background:** Intestinal parasitic infections (IPIs) are a public health issue affecting young children in low and middle income countries (LMICs). These factors may induce malnutrition, as well as systemic and/or intestinal inflammation, depending on the species, intensity of infection, and host response. This study aimed at determining the effect of intestinal parasites on nutritional

status and inflammatory responses in pre- and school-aged children in rural areas of the southern province of Rwanda.

**Methods:** A cross-sectional study involving 127 children under 12 years of age was conducted at two health centers in Huye District, Southern Province, Rwanda, from January to February 2022. A structured questionnaire was used to collect sociodemographic information, feeding habits, anthropometric measurements, and information on infection/malnutrition risk factors. Stool samples were collected to test for intestinal parasites by using microscope, while serum was collected to measure (anti)inflammatory markers [interleukin-10 (IL-10), tumour necrosis factor-alpha (TNF- $\alpha$ ), total protein, and C-reactive protein (CRP)].

**Results:** The overall prevalence of IPIs was 38.6%, with non-pathogenic *Entamoeba coli* being the most prevalent (21.3%), followed by *Ascaris lumbricoides* (18.1%), *Entamoeba histolytica* (11.8%), and *Trichuris trichiura* (1.6%). Coinfections accounted for 12.6% of the infections. Moreover, 48.0%, 25.2%, and 9.4% of the children were stunted, underweight, and stunted, respectively. Underweight, IL-10, and total protein levels were significantly associated with IPIs. Our findings also indicated that food supplements had a significant positive effect on stunting.

**Conclusion:** *Ascaris lumbricoides*, *Entamoeba histolytica*, and *Trichuris trichiura* were the predominant parasites. Intestinal parasitic infections in preschool children and schoolchildren affect the nutritional status, possibly through chronic inflammation. Further mechanistic investigations will shed more light on the regulation of the inflammatory response.

**Keywords:** intestinal parasites; malnutrition; inflammation; children; cytokines, Rwanda

## INTRODUCTION

Human intestinal parasites are grouped into protozoan and intestinal helminths, which cause intestinal parasitic infections (IPIs) in the gastrointestinal tract (1). These infections may induce systemic and/or intestinal inflammation, depending on the species, intensity of infection, and host response. Globally, Soil-transmitted helminths infect more than 2.5 billion people worldwide, while protozoa infect half a billion people worldwide (2,3). These parasites are mainly transmitted via the fecal-oral route, although some can be acquired through skin penetration. In 2021, the World Health Organization (WHO) reported that 149.2 million young children under the age of five were stunted, 45.4 million were wasted, and 38.9 million were overweight (4).

Environmental enablers of intestinal parasites include warmth and humidity, which favour their life cycle (5). Moreover, these parasites are associated with poverty, malnutrition, crowded populations, improper fecal disposal, poor sanitation, unclean water, and a low level of education (5,6). In low and middle income countries (LMICs), there is a high prevalence of IPIs, and while they affect all groups of people, pre- and school-aged children carry the heaviest burden (3,7–9).

The immature immune system of children and exposure to poor hygienic conditions increase susceptibility to IPIs (6). IPIs can lead to and/or exacerbate malnutrition via damage to the intestinal mucosa and interference with nutrient absorption (10–12), while malnutrition can increase susceptibility to IPIs (13). These parasitic infections can negatively contribute to the loss of various nutrients and affect nutritional status (6,9). A deficiency of some micronutrients can reduce the body's immune function and increase the susceptibility of the host to infections (13–16). Malnutrition and IPIs are believed to impair the immune system (17–19). Chronic inflammation in children is a leading cause of mortality, morbidity, language development difficulties, late growth, mental health conditions, poor school performance, and stunting (10,14,15). A number of studies have suggested that inflammation due to helminth infections may indirectly affect the central nervous system (CNS) and negatively affect neurodevelopment in children (20,21).

Soil-transmitted helminths (STHs) promote systemic inflammation by inducing anti-inflammatory cytokines such as IL-10, which are antagonistic to proinflammatory cytokines such as TNF- $\alpha$ , IL-6 and leptin, which are secreted by adipose tissues (22). Infections established by STHs are

characterized by a T-helper cell type 2 (Th2) response, whereas regulatory cytokines (e.g., IL-10 and TGF $\beta$ ) are induced to limit the effect of these responses on helminths and protect the host from immunopathology (23–25). Furthermore, helminths polarize macrophages to an alternatively activated phenotype characterized by Arg-1 and nitric oxide synthase 2 (NOS2) upregulation, downregulation of proinflammatory factors such as IL-6 and TNF- $\alpha$ , and secretion of IL-4, IL-13, and IL-5 in macrophages, innate lymphoid cells 2 (ILC2s), and eosinophils (21). The role of the proinflammatory cytokine TNF- $\alpha$  in gastrointestinal helminths is to induce the Th2 response (26).

In Rwanda, a high prevalence of IPIs has been recorded in various parts of the country (27–29). On the other hand, various efforts have been made by the Government of Rwanda to improve the nutritional status of children by providing food supplements (*Shisha kibondo*) to children from poor families, training parents on how to prepare a balanced diet for children, building kitchen gardens, one cow per family (*Girinka munyarwanda*), early childhood development centers (*Irerero*), and deworming campaigns. In 2020, the Rwanda National Child Development Agency (NCDA) reported that the national prevalence of malnutrition decreased from 38% in 2015 to 33% in 2020 in children under five years of age (30).

However, no studies have been conducted to explain the relationship between intestinal parasites infections, nutritional status and inflammation among children in Rwanda. Therefore, the aim of this study was to assess the effect of intestinal parasitic infections on nutritional status and inflammation among pre- and school-aged children from rural areas of Huye District, southern province of Rwanda.

## **METHODS**

### **Study design**

A cross-sectional study was conducted at the Sovu and Rango Health Centers (HCs) in HUYE District, Southern province of Rwanda, from January to February 2022; the study was carried out on children aged 2-12 years attending Sovu and Rango HCs. A total of 127 children were recruited and assessed for parasitological parameters, Z scores, and risk factors. The number was further reduced to 80 when it comes to the analysis of inflammatory cytokines.

### **Ethical consideration**

The study was approved by the CMHS Institutional Review Board (ethical clearance no CMHS/IRB/355/2021) and KABUTARE District Hospital. In this study, the parents or guardians of the participants were informed of the aim of the study and asked to sign a consent form on behalf of their children. Participation was voluntary, and participants had the right to withdraw at any stage of the study.

### **The eligibility criteria**

All children aged 2-12 years attending Rango and Sovu Health Centers from 7<sup>th</sup> January to 12<sup>th</sup> February 12, 2022 whose parents or guardians agreed to participate were included in this study. Those previously treated for intestinal parasites for at least one month were excluded.

### **Data collection method and examination**

#### ***Questionnaire and consent form***

A structured questionnaire was used to collect information from each participant. It was developed based on known associated risk factors and it was first prepared in English and then translated into the Kinyarwanda (local language). The aim of the study was explained to the parents before collecting blood and stool samples and they were asked to sign a consent form.

#### ***Anthropometric measurements***

The measurements included weight, length but we also recorded the age of the children. The nutritional status of the child (weight for age, height for age, and body mass index (BMI) for age) was also determined. The height of each child was measured using a length board and recorded in centimeters (cm) whereas a digital balance scale was used to measure weight and recorded in kilograms (kg). During height measurement, the heels of the child were attached to the wall of the length board, the legs were straight, the arms were on the side, the head looked forward, and the shoulders relaxed (31).

To measure weight, the children who could stand alone were requested to stand independently at the center of the scales, and those who could not stand alone were weighed along with the mother. Subsequently, the weight of the child was calculated by subtracting the weight of the mother alone.

The weight of each child was measured in minimum clothes, without socks and shoes, and was recorded with a precision of 0.1 kg, and the length was measured and recorded in centimeters (cm).

### ***Sample collection and storage***

Approximately, 4 ml of blood were collected according to World Health Organization (WHO) guidelines (32). After blood collection, tubes were labelled with the participant code and sterile stool containers were labelled with the IDs and given to the parents or children for stool sample collection. Collected stool samples were immediately preserved in 10% formalin. Sera samples were separated from whole blood by centrifugation and stored in a -20 °C freezer at the University Teaching Hospital of Butare (CHUB) laboratory. Preserved stool samples were stored in the Microbiology Laboratory at Huye Campus, College of Medicine and Health Sciences, University of Rwanda.

### **Stool and blood examination**

#### ***Stool examination***

Stool samples were analysed by using the formalin-ether concentration technique by mixing 1 ml of stool with 10 ml of 10% formalin as described by WHO (33). After performing all the procedures recommended by the WHO, two or three drops of normal saline were mixed with the sediment in a tube. One drop of the mixture was added to the slide, and after applying a cover slip, the slides were observed under a microscope at 10X, and then at 40X objectives. Different protozoan cysts and helminth eggs were observed and recorded.

#### ***Blood examination***

Approximately 35 and 45 blood samples from infected and non-infected participants for IPIs, respectively, were selected to randomly assess inflammatory markers. Human TNF- $\alpha$  and human IL-10 were tested using ELISA. A microplate reader was used to measure the absorbance at 450 nm and the concentrations were calculated in pg/ml. Total protein was measured and expressed in mg/dl using a visual machine, whereas C-reactive protein (CRP) was assessed qualitatively using the CRP agglutination test.

### **Data analysis**

The data were recorded in Microsoft Excel and imported into the Statistical Package for the Social Sciences (SPSS) version 27 for analysis. The WHO AnthroPlus version 1.0.4 was used to calculate the Z scores for nutritional status weight for age (WAZ), height for age (HAZ), and body mass index for age (BAZ). However, this version was unable to calculate the WAZ scores for children aged over 10 years due to a lack of WHO reference data. Children aged > 10 years may exhibit secondary sexual characteristics that may increase their weight and age (34). Z scores < -2 standard deviations were considered underweight, stunted, and wasting for the WAZ, HAZ and BAZ, respectively (35). Descriptive statistics (frequencies and percentages) were computed. Pearson's chi-square test and Fisher's exact test were used to analyse differences using SPSS. Statistical significance was assigned for p values less than 0.05.

## RESULTS

A total of 127 children participated in this study and their sociodemographic characteristics are summarized in Table 1. The majority were female (53.5%) and 63% of participants were aged between 2 and 6 years. Only 11% had taken food supplements, 66.1% had a kitchen garden in their family, 31.5% did not wash their hands before eating, and 37.8% had domestic animals in their families. The assessment of nutritional status revealed that stunting and wasting were at 48% and 9.4%, respectively. Among the 110 participants who accessed the WAZ, 25.2% were underweight. The prevalence of parasites was 38.6%.

*Table 1. Sociodemographic characteristics of study population (n=127)*

| Variables                  | Category | Examined | Percentage (%) |
|----------------------------|----------|----------|----------------|
| Sex                        | Male     | 59       | 46.5           |
|                            | Female   | 68       | 53.5           |
| Age                        | 2-6      | 80       | 63             |
|                            | 7-12     | 47       | 37             |
| Hand washing before eating | Always   | 5        | 3.9            |

|                                          |          |     |      |
|------------------------------------------|----------|-----|------|
|                                          | Sometime | 82  | 64.6 |
|                                          | No       | 40  | 31.5 |
| Food supplementation                     | Yes      | 14  | 11   |
|                                          | No       | 113 | 89   |
| Cooking water for drinking               | Always   | 7   | 5.5  |
|                                          | Sometime | 19  | 15   |
|                                          | No       | 101 | 79.5 |
| Easy to reach cleaned water              | Yes      | 116 | 91.3 |
|                                          | No       | 11  | 8.7  |
| Cleaned toilet                           | Yes      | 108 | 85   |
|                                          | No       | 19  | 15   |
| Trained for preparing balanced for child | Yes      | 98  | 77.2 |
|                                          | No       | 29  | 22.8 |
| Prepare balanced diet for child          | Always   | 8   | 6.3  |
|                                          | Sometime | 103 | 81.1 |
|                                          | No       | 16  | 12.6 |
| Having Kitchen Garden                    | Yes      | 84  | 66.1 |
|                                          | No       | 43  | 33.9 |
| Having domestic animals                  | Yes      | 48  | 37.8 |
|                                          | No       | 79  | 62.2 |
| Signs of IPIs                            | Yes      | 107 | 84.3 |



|                                    |             |     |      |
|------------------------------------|-------------|-----|------|
|                                    | No          | 20  | 15.7 |
| Nutritional status<br>WAZ(n=(110)) | Underweight | 32  | 25.2 |
|                                    | Normal      | 78  | 61.4 |
| HAZ                                | Stunted     | 61  | 48   |
|                                    | Normal      | 66  | 52   |
| BAZ                                | Wasted      | 12  | 9.4  |
|                                    | Normal      | 115 | 90.6 |
| Intestinal parasites infections    | Infected    | 49  | 38.6 |
|                                    | No infected | 78  | 61.4 |

### Predominant parasites

The distribution of intestinal parasites in the study population was also assessed. Nonpathogenic *Entamoeba coli* was the most prevalent (21.3%), followed by *Ascaris lumbricoides* (18.1%), *Entamoeba histolytica* (11.8%) and *Trichuris trichiura* (1.6%). Moreover, 12.6% of the children had more than one parasite (coinfection) (Figure 1).

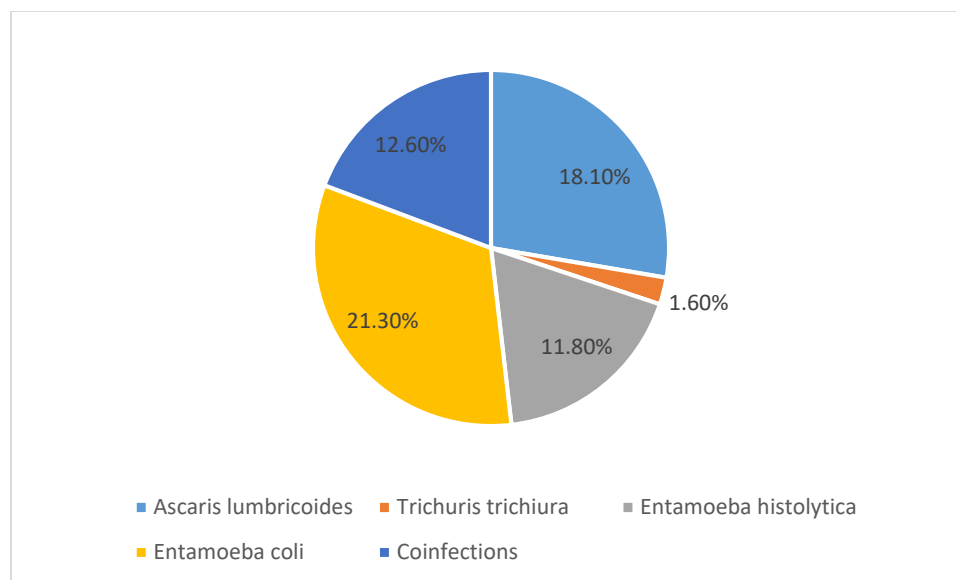

**Figure 1:** Distribution of intestinal parasites among the study population (n=127)

### Association between IPIs and nutritional status

There was an association between IPIs and the nutritional status of the population. A statistically significant association was seen between IPIs vs underweight ( $p < 0.001$ ), IPIs vs stunting ( $p = 0.002$ ), and IPIs vs wasting ( $p = 0.001$ ) (Table 2)

**Table 2.** Association of IPIs with nutritional status of study population (n=127)

| Variables      | Category    | Total examined | Not infected No. (%) | Infected No. (%) | X <sup>2</sup> | P value |
|----------------|-------------|----------------|----------------------|------------------|----------------|---------|
| WAZ<br>(n=110) | Underweight | 32             | 20 (62.5)            | 12 (37.5)        | 105.679        | <0.001  |
|                | Normal      | 78             | 50 (64.1)            | 28 (35.9)        |                |         |
| HAZ            | Stunted     | 61             | 34 (55.7)            | 27 (44.3)        | 110.823        | 0.002   |
|                | Normal      | 66             | 44 (67.6)            | 22 (32.4)        |                |         |

|     |        |     |          |          |         |              |
|-----|--------|-----|----------|----------|---------|--------------|
| BAZ | Wasted | 12  | 5(41.7)  | 7(58.3)  | 109.768 | <b>0.001</b> |
|     | Normal | 115 | 73(63.5) | 42(36.5) |         |              |

---

### Association between IPIs and inflammatory cytokines

We also assessed association between IPIs and inflammatory cytokines. A statistically significant association ( $p=0.029$ ) was observed in an infected child with a normal concentration of IL-10 and high total protein ( $p=0.022$ ), but there was no association with other inflammatory cytokines (Table 3)

*Table 3. Association of IPIs with inflammatory cytokines (n=80)*

| Variables     | Category | Not infected | Infected  | P value      |
|---------------|----------|--------------|-----------|--------------|
|               |          | No (%)       | No (%)    |              |
| TNF- $\alpha$ | Low      | 38 (55.1)    | 31 (44.9) | 0.24         |
|               | Normal   | 7 (63.6)     | 4 (36.4)  |              |
|               | High     | 0 (0)        | 0 (0)     |              |
| IL-10         | Low      | 1 (100)      | 0 (0)     | <b>0.029</b> |
|               | Normal   | 44 (55.7)    | 35 (44.3) |              |
|               | High     | 0 (0)        | 0 (0)     |              |
| Total protein | Low      | 26 (65)      | 14 (35)   | <b>0.022</b> |
|               | Normal   | 15 (60)      | 10 (40)   |              |
|               | High     | 4 (26.7)     | 11 (73.3) |              |
| CRP           | Positive | 7 (46.7)     | 8 (53.3)  | 0.407        |

Negative 38 (58.5) 27 (41.5)

### Association between risk factors and nutritional status

We then evaluated the association between promoting risk factors and nutritional status. There was a statistically significant association between food supplement and HAZ ( $p=0.047$ ). Also, having a kitchen garden was significantly associated with WAZ ( $p=0.027$ ) and HAZ ( $p<0.001$ ) but not with other risk factors (Table 4)

*Table 4. Association between nutritional status and risk factors (n=127)*

| Variables                        | Category  | WAZ         |        |              | HAZ     |        |                  | BAZ    |        |         |
|----------------------------------|-----------|-------------|--------|--------------|---------|--------|------------------|--------|--------|---------|
|                                  |           | Underweight | Normal | P value      | Stunted | Normal | P value          | Wasted | Normal | P value |
| Food supplement                  | Yes       | 4           | 8      | 0.743        | 3       | 11     | <b>0.047</b>     | 1      | 13     | 1.000   |
|                                  | No        | 28          | 70     |              | 58      | 55     |                  | 11     | 102    |         |
| Kitchen garden                   | Yes       | 16          | 57     | <b>0.027</b> | 30      | 54     | <b>&lt;0.001</b> | 10     | 74     | 0.336   |
|                                  | No        | 16          | 21     |              | 31      | 12     |                  | 2      | 41     |         |
| Trained to prepare balanced diet | Yes       | 29          | 62     | 0.266        | 45      | 53     | 0.405            | 10     | 88     | 0.733   |
|                                  | No        | 3           | 16     |              | 16      | 13     |                  | 2      | 27     |         |
| Taking balanced diet             | Yes       | 5           | 3      | 0.128        | 4       | 4      | 0.188            | 0      | 8      | 0.393   |
|                                  | No        | 2           | 6      |              | 11      | 5      |                  | 0      | 16     |         |
|                                  | Sometimes | 25          | 69     |              | 46      | 57     |                  | 12     | 91     |         |
| Domestic animals                 | Yes       | 10          | 29     | 0.663        | 27      | 21     | 0.200            | 12     | 115    | 0.764   |
|                                  | No        | 22          | 49     |              | 34      | 45     |                  | 7      | 72     |         |

**intestinal parasites and risk factors**

There were associations between intestinal parasites and some risk factors. IPIs were significantly associated with age group ( $p=0.038$ ), hand washing before eating ( $p=0.038$ ), and cooking water for drinking ( $p=0.009$ ). However, no associations were observed with other risk factors (Table 5)

*Table 5. Association of IPIs with risk factors (n=127)*

| Variables                  | Category | No infected | Infected<br>No (%) | p value      |
|----------------------------|----------|-------------|--------------------|--------------|
| Sex                        | Male     | 35          | 24<br>(40.7)       | 0.716        |
|                            | Female   | 43          | 25<br>(36.8)       |              |
| Age                        | 2-6      | 55          | 25<br>(31.2)       | <b>0.038</b> |
|                            | 7-12     | 23          | 24<br>(51.1)       |              |
| Hand washing before eating | Always   | 1           | 4 (80)             | <b>0.038</b> |
|                            | Sometime | 56          | 26<br>(31.7)       |              |
|                            | No       | 21          | 19<br>(47.5)       |              |
| Cooking water for drinking | Always   | 3           | 4 (57.1)           | <b>0.009</b> |
|                            | Sometime | 17          | 2 (10.5)           |              |
|                            | No       | 58          | 43<br>(42.5)       |              |
| Access to cleaned water    | Yes      | 71          | 45<br>(38.8)       | 1.000        |

|                |     |    |              |       |
|----------------|-----|----|--------------|-------|
|                | No  | 7  | 4 (36.4)     |       |
| Cleaned toilet | Yes | 70 | 38<br>(35.2) | 0.076 |
|                | No  | 8  | 11<br>(57.9) |       |
| Signs of IPIs  | Yes | 66 | 41(38.3)     | 1.000 |
|                | No  | 12 | 8 (40)       |       |

## DISCUSSION

Intestinal parasites and malnutrition cause severe problems in children in LMICs (36). Intestinal parasitic infections have been associated with growth retardation and various health-related problems (15). This study assessed the effect of IPIs on children's nutritional status and inflammatory response.

The current study reported that the prevalence of IPIs among children living in rural settings in Huye District was 38.6%. The prevalence of this study was lower than 44.8% and 77.7% previously reported in Rwanda (28),(29), 44.3% and 52.9% reported in Ethiopia (37), 34) reported in Ethiopia, 82% and 95.3% previously reported in Pakistan (26, 35). However, the prevalence of this study was higher than 16.6% previously reported in a study conducted in Nigeria (9). The difference may be due to the small sample size of our study, the inability to detect trophozoites of *E. histolytica*, *E. coli* and *G. lamblia*, which might have been lost during preservation, the season of sampling, and the use of a deworming program in Rwanda.

Older children (aged 7-12 years) had a greater prevalence of infection, which might be due to that the older children in rural areas are engaged in farming activities resulting in exposure to soil and water (6). The same findings were also found in different studies (39–41). In addition, this study revealed a significantly greater prevalence of IPIs among children who ate without washing their hands and who drank unboiled water. The high prevalence of *Entamoeba coli* found in the area,

even if considered as non-pathogen, indicates poor hygiene. This is in agreement with previous studies which showed positive association between poor hygiene and IPIs (2,28,42–44).

In this study, the prevalence of stunting, underweight, and wasting were 48.0%, 25.2% and 9.4%, respectively. The high stunting prevalence might be caused by a lack of a balanced diet, especially in those from poor families (3). We found a statistically significant association between IPIs and underweight ( $p < 0.001$ ), stunting ( $p = 0.002$ ), and wasting ( $p = 0.001$ ). These associations are in line with findings from Nigeria (45), Indonesia (5) and Ethiopia (46) that showed a positive association between IPIs and underweight. In contrast, Irisarri-Gutiérrez et al. (27) reported no association between IPIs and nutritional status in the Gakenke District, Northern Province, Rwanda. Children infected with intestinal parasites lose appetite and sometimes nutrients in case of intestinal perforations. This could contribute to status of the children being underweight, stunting, and wasting.

This study revealed an association between IPIs and the systemic anti-inflammatory marker IL-10 ( $p = 0.029$ ) and the marker of malnutrition total protein ( $p = 0.022$ ). This differs from the findings of a study by Zonta et al. (47) conducted in Mexico showing that the increase in IL-10 could be linked to Th2 activation that can increase the predisposition to IPIs and bacterial infections (16). The high total protein concentration observed might have been caused by chronic inflammation resulting from IPIs (13). This study suggested that a high total protein concentration might be associated with intestinal parasite infections. It has been reported that inflammation decreases the total protein concentration by reducing protein synthesis (48). A decrease in the concentration of total protein and body mass index increases the risk of mortality (48), while TNF- $\alpha$  is produced by macrophages and monocytes in the acute phase as a result of the response to parasitic infections. TNF- $\alpha$  increases the production of acute phase proteins such as CRP, ferritin, and complement factors, whereas total protein decreases (13).

Our findings indicate that children who did not consume food supplements had significantly greater levels of stunting, highlighting the positive impact of the program on children's health in Rwanda. In addition, our study showed a significant association between having a kitchen garden and being underweight and stunted. These findings suggest that low quality and quantity of food intake is a contributor to malnutrition in Huye District. Poverty is the main cause of an inadequate diet, which may affect both the quality and quantity of food, resulting in a lack of nutrients required

for the physiological function of the body(20).. No associations were detected between nutritional status and the other associated risk factors in this study. To the best of our knowledge, this is the first study to focus on inflammation in children infected with parasites and with malnutrition in Rwanda.

### **Limitations:**

This study had some limitations. First, it was conducted in rural areas which could differ from urban areas. Second, the sample size was small which could not be representative of the whole district. Larger studies with any observational component will shed light on the possible associations.

### **Conclusion**

The overall prevalence of IPIs was 38.6% and the predominant parasites were *A. lumbricoides*, *E. histolytica*, and *T. trichiura*. A considerable number of children were stunted, underweight, and underweight. Underweight, IL-10, and total protein levels were significantly associated with IPIs. Improving sanitation and nutrition of children ameliorate the nutritional status of children and their families. Also, regular deworming practices at schools should be encouraged to prevent negative effects of IPIs to the growth and educational outcomes of children

### **Acknowledgement**

The authors wish to acknowledge all parents/guardians and children who consented to participate in this study. We thank the Institutional Review Board (IRB) of CMHS, KABUTARE District Hospital for approving our study. We acknowledge the guidance of ReachSci Society of the Cambridge University through the ReachSci STEM Mini-PhD program. Lastly, our gratitude goes to the administration of Sovu and Rango Health Centers for supporting this study.

### **Conflict of interest**

The authors declare that they have no conflicts of interest.

### **Authorship contribution**



**WT, XN, JDAI, and JFM:** Conception, writing review, data analysis, interpretation, and manuscript drafting; **PK:** co-supervision, project administration, writing, and design of the work; **KOA:** interpretation, and manuscript drafting; **NG:** writing original draft, visualisation and, significantly improved the manuscript, and **NR:** supervision, data curation, validation, critical review of the work for important intellectual content, final approval of the version to be published. All authors were involved in writing the paper and provided final approval for publication.

### **Funding**

No funding has been obtained for this study.

### **Data availability statement**

All relevant data are within the article.

### **Disclaimer**

The views and opinions expressed in this article are of those of the authors and do not necessarily represent the official policy or position of any affiliation agency of the authors.

## REFERENCES

1. Haque R. Human intestinal parasites. *J Heal Popul Nutr.* 2007;25(4):387–91.
2. Hailu GG, Ayele ET. Assessment of the prevalence of intestinal parasitic infections and associated habit and culture-related risk factors among primary schoolchildren in Debre Berhan town, Northeast Ethiopia. *BMC Public Health.* 2021;21(1):1–12.
3. Kesete Y, Tesfahiwet H, Fessehaye G, Kidane Y, Tekle Y, Yacob A, et al. Assessment of Prevalence and Risk Factors for Intestinal Parasitosis , Malnutrition , and Anemia among School Children in Ghindae Area , Eritrea. 2020;2020.
4. UNICEF/WHO/WORLD BANK. Levels and trends in child malnutrition UNICEF / WHO / World Bank Group Joint Child Malnutrition Estimates Key findings of the 2021 edition. World Heal Organ [Internet]. 2021;1–32. Available from: <https://www.who.int/publications/i/item/9789240025257>
5. Sari IP, Audindra S, Zhafira AS, Rahma AA, Syarira C V., Wahdini S. Nutritional status of school-aged children with intestinal parasite infection in South Jakarta, Indonesia. *Open Access Maced J Med Sci.* 2021;9(E):95–100.
6. Id AH, Id LA, Id MR, Andriantsalama P, Randriamparany R, Randremanana RV, et al. High prevalence of intestinal parasite infestations among stunted and control children aged 2 to 5 years old in two neighborhoods of Antananarivo , Madagascar. 2021;1–22.
7. Hajissa K, Islam MA, Sanyang AM, Mohamed Z. Prevalence of intestinal protozoan parasites among school children in africa: A systematic review and meta-analysis. *PLoS Negl Trop Dis* [Internet]. 2022;16(2):1–20. Available from: <http://dx.doi.org/10.1371/journal.pntd.0009971>
8. El-Sherbini GT, Abosdera MM. Risk factors associated with intestinal parasitic infections among children. *J Egypt Soc Parasitol.* 2013;43(1):287–94.
9. Ihejirika OC, Nwaorgu OC, Ebirim CI, Nwokeji CM. Effects of intestinal parasitic infections on nutritional status of primary children in Imo State Nigeria. *Pan Afr Med J.*

- 2019;33:1–9.
10. Feleke BE. Nutritional Status and Intestinal Parasite in School Age Children: A Comparative Cross-Sectional Study. *Int J Pediatr.* 2016;2016:1–8.
  11. Id ECM, Palmeirim MS, Minja EG, Id KZL, Id JK. Malnutrition, anemia, micronutrient deficiency and parasitic infections among schoolchildren in rural Tanzania. 2022;1–16. Available from: <http://dx.doi.org/10.1371/journal.pntd.0010261>
  12. Bakarman MA, Hegazi MA, Butt NS. Prevalence , Characteristics , Risk Factors , and Impact of Intestinal Parasitic Infections on School Children in Jeddah ,. 2019;9(December 1995):81–7.
  13. Rytter MJH, Kolte L, Briend A, Friis H, Christensen VB. The immune system in children with malnutrition - A systematic review. *PLoS One.* 2014;9(8).
  14. Papier K, Williams GM, Luceres-Catubig R, Ahmed F, Olveda RM, McManus DP, et al. Childhood malnutrition and parasitic helminth interactions. *Clin Infect Dis.* 2014;59(2):234–43.
  15. Fauziah N, Aviani JK, Agrianfanny YN, Fatimah SN. Intestinal Parasitic Infection and Nutritional Status in Children under Five Years Old : A Systematic Review. 2022;
  16. Mrimi EC, Palmeirim MS, Minja EG, Long KZ, Keiser J. Correlation of Cytokines with Parasitic Infections , Undernutrition and Micronutrient Deficiency among Schoolchildren in Rural Tanzania : A Cross-Sectional Study. 2023;
  17. Delgado AF, Okay TS, Leone C, Nichols B, Del Negro GM, Costa Vaz FA. Hospital malnutrition and inflammatory response in critically ill children and adolescents admitted to a tertiary intensive care unit. *Clinics.* 2008;63(3):357–62.
  18. DeBoer MD, Scharf RJ, Leite AM, Ferrer A, Havt A, Pinkerton R, et al. Systemic inflammation, growth factors, and linear growth in the setting of infection and malnutrition. *Nutrition.* 2017;33:248–53.

19. Hughes S, Kelly P. Interactions of malnutrition and immune impairment, with specific reference to immunity against parasites. *Parasite Immunol.* 2006;28(11):577–88.
20. Galler JR, Koethe JR, Yolken RH. Neurodevelopment: The impact of nutrition and inflammation during adolescence in low-resource settings. *Pediatrics.* 2017;139(12):S72–84.
21. Cortes-Selva D, Fairfax K. Schistosome and intestinal helminth modulation of macrophage immunometabolism. *Immunology.* 2021;162(2):123–34.
22. Zavala GA, García OP, Camacho M, Ronquillo D, Campos-Ponce M, Doak C, et al. Intestinal parasites: Associations with intestinal and systemic inflammation. *Parasite Immunol.* 2018;40(4):1–6.
23. Sanchez AL, Mahoney DL, Gabrie JA. Interleukin-10 and soil-transmitted helminth infections in Honduran children. *BMC Res Notes.* 2015;8(1).
24. Maizels RM, McSorley HJ. Regulation of the host immune system by helminth parasites. *J Allergy Clin Immunol.* 2016;138(3):666–75.
25. Gazzinelli-Guimaraes PH, Nutman TB. Helminth parasites and immune regulation. *F1000Research.* 2018;7(0).
26. Garside P, Kennedy MW, Wakelin D, Lawrence CE. Immunopathology of intestinal helminth infection. *Parasite Immunol.* 2000;22(12):605–12.
27. Irisarri-Gutiérrez MJ, Acosta L, Parker LA, Toledo R, Bornay-Llinares FJ, Esteban JG, et al. Anemia and undernutrition in intestinally parasitized schoolchildren from Gakenke district, Northern Province of Rwanda. *PLoS One.* 2022;17(1 January):1–13.
28. Butera E, Mukabutera A, Nsereko E, Munyanshongore C, Rujeni N, Mwikarago IE, et al. Prevalence and risk factors of intestinal parasites among children under two years of age in a rural area of Rutsiro district, Rwanda – A cross-sectional study. *Pan Afr Med J.* 2019;32(February).

29. Kabatende J, Mugisha M, Ntirenganya L, Barry A, Ruberanziza E, Mbonigaba JB, et al. Prevalence, intensity, and correlates of soil-transmitted helminth infections among school children after a decade of preventive chemotherapy in Western Rwanda. *Pathogens*. 2020;9(12):1–20.
30. Rwanda U. Health , Nutrition and Early Childhood Development in Rwanda. 2024;(January).
31. Osman KA, Zinsstag J, Tschopp R, Schelling E, Hattendorf J, Umer A, et al. Nutritional status and intestinal parasites among young children from pastoralist communities of the Ethiopian Somali region. *Matern Child Nutr*. 2020;16(3):1–11.
32. N. Dhingra, M. Diepart, G. Dziekan, S. Khamassi, F. Otazia S wilburn. WHO guidelines on drawing blood : best practices in phlebotomy. *World Heal Organ [Internet]*. 2010;1–105. Available from: <https://www.ncbi.nlm.nih.gov/books/NBK138650/>
33. WHO. Bench aids. 2019. 32 p.
34. Hailegebriel T. Undernutrition, intestinal parasitic infection and associated risk factors among selected primary school children in Bahir Dar, Ethiopia. *BMC Infect Dis*. 2018;18(1):1–11.
35. Ngonjo TW, Kihara J, Njoka A, Gicheru M, ... Risk Factors associated with Intestinal Parasitic Infections on School Children in Thika District, Central Kenya. *African J Heal ... [Internet]*. 2015;29(4):2189. Available from: <https://www.ajol.info/index.php/ajhs/article/view/201563%0Ahttps://www.ajol.info/index.php/ajhs/article/view/201563/190084>
36. Cossa-Moiane I, Roucher C, Quene T Mac, Campos-Ponce M, de Deus N, Polman K, et al. Association between Intestinal Parasite Infections and Proxies for Body Composition: A Scoping Review. *Nutrients*. 2022;14(11).
37. Debash H, Alemu M, Bisetegn H. The prevalence of intestinal parasites, undernutrition and their associated risk factors among school-age children in Sekota Town, Northeast Ethiopia: A community-based cross-sectional study. *Heal Sci Reports*. 2023;6(3).

38. Eyayu T, Kiros T, Workineh L, Sema M, Damtie S, Hailemichael W, et al. Prevalence of intestinal parasitic infections and associated factors among patients attending at Sanja Primary Hospital, Northwest Ethiopia: An institutional-based cross-sectional study. *PLoS One*. 2021;16(2 February):1–14.
39. Ulhaq Z, Khan W, Khan MF, Kabir M, Ujjan AA, Ullah W, et al. Prevalence of intestinal parasitic diseases in school children of rural areas of district lower dir, pakistan. *Brazilian J Biol*. 2022;82:8–15.
40. Ross AG, Papier K, Luceres-Catubig R, Chau TN, Inobaya MT, Ng SK. Poverty, dietary intake, intestinal parasites, and nutritional status among school-age children in the rural Philippines. *Trop Med Infect Dis*. 2017;2(4):1–10.
41. Chowdhury S, Chakraborty P pratim. Prevalence and Risk Factors of Intestinal Parasitic Infection in Under-Five Children With Malnutrition: A Hospital Based Cross-Sectional Study. *J Fam Med Prim Care [Internet]*. 2017;6(2):169–70. Available from: <http://www.jfmpc.com/article.asp?issn=2249-4863;year=2017;volume=6;issue=1;spage=169;epage=170;aulast=Faizi>
42. Al-Halani AA, Edrees WH, Alrahabi LM, Thabit JM, Al-Bahloul SM, Alwashali FA, et al. Prevalence of Intestinal Parasites, Malnutrition, Anemia and Their Risk Factors Among Orphaned Children in Sana'a City, Yemen. *Univers J Pharm Res*. 2023;(May).
43. Gyang VP, Chuang T wu, Liao C wei, Lee Y lun, Akinwale OP, Orok A, et al. ScienceDirect Intestinal parasitic infections : Current status and associated risk factors among school aged children in an archetypal African urban slum in Nigeria. *J Microbiol Immunol Infect [Internet]*. 2019;52(1):106–13. Available from: <https://doi.org/10.1016/j.jmii.2016.09.005>
44. Marques RC, Bernardi JVE, Dorea CC, Dórea JG. Intestinal parasites, anemia and nutritional status in young children from transitioning Western Amazon. *Int J Environ Res Public Health*. 2020;17(2).
45. El Sahn FF, Deghedi BM, Mahdy NH, El Sahn A. The impact of intestinal parasitic

- infections on the nutritional status of primary school children in Alexandria, Egypt. *J Egypt Public Health Assoc.* 1997;72(1–2):113–51.
46. Alemneh K, Sintayehu A, Dejene H, Getenesh B. Intestinal parasitic infections and nutritional status of pre-school children in Hawassa Zuria District, South Ethiopia. *African J Microbiol Res.* 2017;11(31):1243–51.
  47. Zonta ML, Cociancic P, Oyhenart EE, Navone GT. Intestinal parasitosis, undernutrition and socio-environmental factors in schoolchildren from clorinda formosa, argentina. *Rev Salud Publica.* 2019;21(2):224–31.
  48. Kaysen GA. Association between inflammation and malnutrition as risk factors of cardiovascular disease. *Blood Purif.* 2006;24(1):51–5.
